# Supplementary material
Source: Springer Nature journal article supplement (https://www.springermedizin.de/resource/supplementary/12937_2013_718_MOESM2_ESM.pdf/25653666)
Supplement: MOESM2 [file 25653666]

## information on label influenced purchase

### brand name

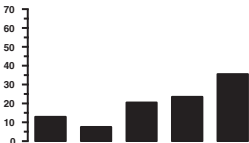

### ingredients

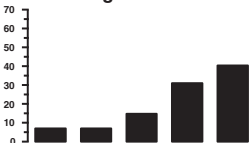

### recommended dosage and directions for use

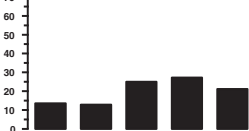

### claims

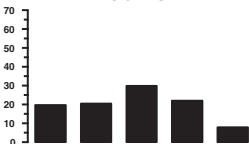

### disclaimers and warnings

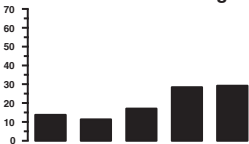

### quality of product

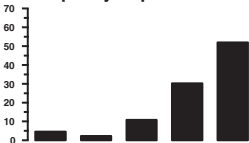

### free of banned substances

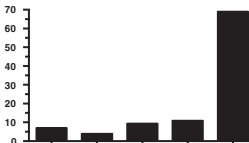

## information on label did not influence purchase - other factors did

### coach, fitness trainer, peers

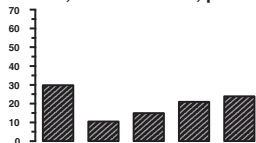

### supplement representative

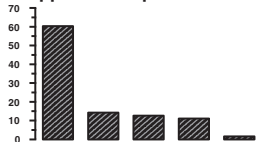

### pharmacist, nutritionist, doctor

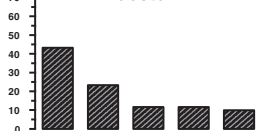

### print media (eg. magazine, newspaper)

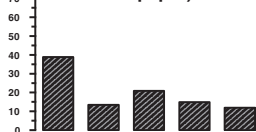

### electronic media (eg. TV, radio)

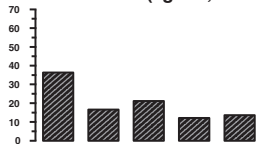

### social media and internet (eg. websites, twitter, facebook)

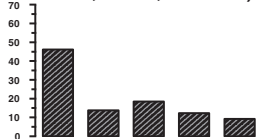

% of respondents

% of respondents
